# Supplementary material
Source: Springer Nature journal article supplement (https://www.springermedizin.de/resource/supplementary/12874_2010_428_MOESM1_ESM.pdf/9432070)
Supplement: MOESM1 [file 9432070]

ENROLMENT

**Assessed for eligibility**  
(Patients from 2 tertiary care institutions with urban HIV clinics and rural satellite clinics)

**Inclusion criteria**

- Documented HIV-1 infection, age 18-60 years
- ART-naïve (no previous ART use for > 14 continuous days)
- Meeting national criteria for initiating first-line ART
- Willingness to come for all study visits

**Exclusion criteria**

- Severely ill (Karnofsky score < 70)
- Study participant already in the same household
- Lives in area with no phone network

ALLOCATION

**Randomization (n=600)**  
Permuted block randomization

**Mobile phone intervention (n = 300)**

- Automated interactive voice calls
  - frequency: once a week
  - timing of call: selected by participant
- weekly pictorial text message
- + Standard of care

**Standard of care (n = 300)**

- Establish rapport with participant
- Counseling on ART and adherence at initiation and at subsequent visits
- Create treatment plan

FOLLOW-UP

**Follow-up: Every 3 months for 24 months, or until primary endpoint is reached, whichever earlier**

- Clinical assessment
- Adherence assessment (self-report, pill count)
- CD4, HIV viral load

OUTCOMES

**Primary outcome:** Time to virological failure  
**Secondary outcome:** Adherence

**Sub-group analyses:**

- Patterns of drug resistance at failure in the two arms
- Comparison between self-reported adherence versus pill count
- Quality of life differences in the two arms
- Gender and socio-economic differences in adherence in the two arms
